# Supplementary material for: The Association of Periodontal Disease and Oral Health with Hypertension, NHANES 2009-2018
Source: Research Square preprint supplement (doi:10.21203/rs.3.rs-2193732/v1), 2022-12-02
Supplement: Supplementary file 1 [file 3dcbaac7833c8e9cc057f391.docx]

**Table 1. Characteristics of overall participants according to hypertension status in NHANES, 2009-2018.** (N=21,800).

| Variables | Non-hypertension | Hypertension | *p-*value |
| --- | --- | --- | --- |
| No. of participants | 10783(49.46) | 11017(50.54) |  |
| Age, y, mean (SE) | 47.95(0.24) | 59.04(0.21) | <0.001 |
| Sex, N(%) |  |  | 0.012 |
| Male | 5140(46.74) | 5412(48.93) |  |
| Female | 5643(53.26) | 5606(51.07) |  |
| Race/ethnicity, N(%) |  |  | <0.001 |
| Mexican American | 1753(9.21) | 1283(5.90) |  |
| Other Hispanic | 1193(6.14) | 1060(4.90) |  |
| Non-Hispanic White | 4363(67.38) | 4469(68.23) |  |
| Non-Hispanic Black | 1742(8.35) | 2964(13.68) |  |
| Other Race-Including  Multi-Racial | 1732(8.91) | 1241(7.29) |  |
| Smoking, N(%) |  |  | <0.001 |
| Yes | 4520(42.01) | 5398(49.76) |  |
| No | 6263(57.99) | 5619(50.24) |  |
| Periodontal disease, N(%) |  |  | <0.001 |
| Yes | 1905(16.47) | 2178(19.92) |  |
| No | 8878(83.53) | 8839(80.08) |  |
| Oral Health, N(%) |  |  | <0.001 |
| Excellent/Very good | 3584(40.87) | 3185(34.83) |  |
| Good | 3779(34.00) | 3757(34.00) |  |
| Fair | 2374(17.53) | 2620(19.91) |  |
| Poor | 1046(7.60) | 1455(11.27) |  |
| Education, N(%) |  |  | <0.001 |
| <High school | 2374(13.77) | 2923(17.13) |  |
| High school | 2147(19.45) | 2669(25.11) |  |
| >High school | 6252(66.74) | 5407(57.66) |  |
| Missing | 10(0.01) | 18(0.11) |  |
| BMI, N(%) |  |  | <0.001 |
| <18.5 | 232(1.83) | 312(2.41) |  |
| 18.5~24.9 | 3330(31.28) | 1949(16.17) |  |
| 25~29.9 | 3757(35.15) | 3450(31.41) |  |
| ≥30 | 3440(31.51) | 5286(49.83) |  |
| Missing | 24(0.23) | 20(0.18) |  |
| Sleep duration, N(%) |  |  | <0.001 |
| <7 | 7679(68.23) | 7672(67.52) |  |
| 7-9 | 2737(28.93) | 2747(27.53) |  |
| >9 | 367(2.84) | 598(4.95) |  |
| Alcohol consumption, N(%) |  |  | <0.001 |
| No drinks | 337(3.07) | 615(4.87) |  |
| ≤1 drink/week | 4745(45.21) | 4039(39.46) |  |
| >1 drink/week | 2145(25.24) | 2072(23.82) |  |
| Missing | 3556(26.48) | 4291(31.84) |  |
| Physical activity, N(%) |  |  | <0.001 |
| Inactive | 4390(44.76) | 3976(41.37) |  |
| Active | 6384(55.20) | 7037(58.62) |  |
| Missing | 9(0.05) | 4(0.01) |  |
| Total-cholesterol, mg/dl,  mean (SE) | 197.71(0.67) | 195.03(0.80) | <0.001 |
| Triglyceride, mg/dl,  mean (SE) | 146.27(1.85) | 172.62(1.90) | <0.001 |
| Creatinine, mg/dl, mean (SE) | 0.85(0.00) | 0.95(0.01) | <0.001 |
| HDL, mg/dl, mean (SE) | 55.11(0.31) | 52.64(0.29) | <0.001 |
| HbA1c, mg/dl, mean (SE) | 5.55(0.01) | 5.98(0.01) | <0.001 |

All N are analytic sample N.

SE, standard error of mean.

All % and mean (SE) are weighted in order to represent the USA population.

BMI, body mass index; HbA1c, glycohemoglobin A1c;

HDL, high-density lipoprotein.

**Table 2. Multivariable odds ratios (ORs, 95%CI) of** **prevalence of hypertension and stratified by smoking status.**

|  | Cases/total  participants | OR (95% CI) | | |
| --- | --- | --- | --- | --- |
| Model 1 | Model 2 | Model 3 |
| Oral health | | | | |
| Excellent/  Very good | 3185/6769 | 1.00 | 1.00 | 1.00 |
| Good | 3757/7536 | 1.23(1.12-1.35) | 1.19(1.08-1.31) | 1.17(1.05-1.30) |
| Fair | 2620/4994 | 1.48(1.32-1.65) | 1.42(1.27-1.59) | 1.37(1.22-1.54) |
| Poor | 1455/2501 | 1.84(1.58-2.15) | 1.73(1.46-2.04) | 1.61(1.36-1.92) |
| *P-*trend |  | <0.001 | <0.001 | <0.001 |
| Non-Smoking | | | | |
| Excellent/  Very good | 1801/4151 | 1.00 | 1.00 | 1.00 |
| Good | 2004/4320 | 1.22(1.07-1.38) | 1.16(1.03-1.31) | 1.13(0.99-1.28) |
| Fair | 1293/2529 | 1.73(1.49-2.02) | 1.61(1.38-1.89) | 1.55(1.32-1.82) |
| Poor | 521/882 | 2.33(1.88-2.89) | 1.97(1.56-2.48) | 1.78(1.40-2.27) |
| *P-*trend |  | <0.001 | <0.001 | <0.001 |
| Smoking | | | | |
| Excellent/  Very good | 1384/2618 | 1.00 | 1.00 | 1.00 |
| Good | 1753/3216 | 1.19(1.03-1.38) | 1.17(1.01-1.36) | 1.18(1.01-1.38) |
| Fair | 1327/2465 | 1.20(1.02-1.42) | 1.19(1.01-1.41) | 1.17(0.98-1.39) |
| Poor | 934/1619 | 1.49(1.22-1.82) | 1.45(1.17-1.80) | 1.41(1.13-1.76) |
| *P-*trend |  | <0.001 | <0.001 | 0.002 |
| *P*-interation | <0.001 | | | |
| Periodontal disease | | | | |
| No | 8839/17717 | 1.00 | 1.00 | 1.00 |
| Yes | 2178/4083 | 1.35(1.22-1.49) | 1.31(1.19-1.45) | 1.28(1.16-1.42) |
| *P-*trend |  | <0.001 | <0.001 | <0.001 |
| Non-Smoking | | | | |
| No | 4664/10018 | 1.00 | 1.00 | 1.00 |
| Yes | 955/1864 | 1.41(1.20-1.66) | 1.31(1.11-1.55) | 1.28(1.08-1.53) |
| *P-*trend |  | <0.001 | 0.001 | 0.005 |
| Smoking | | | | |
| No | 4175/7699 | 1.00 | 1.00 | 1.00 |
| Yes | 1223/2219 | 1.24(1.06-1.44) | 1.23(1.06-1.44) | 1.22(1.04-1.43) |
| *P-*trend |  | 0.005 | 0.007 | 0.014 |
| *P*-interation | <0.001 | | | |

Model 1: adjusted for age, sex, race/ethnicity, education.

Model 2: Model 1 plus BMI, sleep duration, alcohol intake, physical activity.

Model 3: Model 2 plus cholesterol-total, creatinine, triglyceride, HbA1c, HDL.
